# Supplementary material for: Thorium(iv) trialkyl complexes of non-carbocyclic ligands as highly active isoprene polymerisation catalysts
Source: Royal Society of Chemistry journal article supplement (doi:10.1039/c9dt01617a), 2019-01-01
Supplement: c9dt01617a1.pdf [file c9dt01617a1.pdf]

Electronic Supplementary Information

**Thorium(IV) trialkyl complexes of non-carbocyclic  
ligands as highly active isoprene polymerisation  
catalysts**

Guorui Qin<sup>a,b</sup> and Jianhua Cheng<sup>\*a,c</sup>

a. State Key Laboratory of Polymer Physics and Chemistry, Changchun Institute of Applied Chemistry, Chinese Academy of Sciences, No. 5625, Renmin Street, Changchun, 130022 (China). E-mail: jhcheng@ciac.ac.cn

b. University of Chinese Academy of Sciences, Changchun Branch, Changchun, 130022 (China).

c. University of Science and Technology of China, Hefei, Anhui 230029 (China).

**Contents**

1.  $^1\text{H}$  and  $^{13}\text{C}\{^1\text{H}\}$  NMR spectra of complex **1**
2.  $^1\text{H}$ ,  $^{13}\text{C}\{^1\text{H}\}$  and  $^{31}\text{P}\{^1\text{H}\}$  NMR spectra of complex **2**
3.  $^1\text{H}$ ,  $^{13}\text{C}\{^1\text{H}\}$  and  $^{31}\text{P}\{^1\text{H}\}$  NMR spectra of complex **3**
4.  $^1\text{H}$ , and  $^{13}\text{C}\{^1\text{H}\}$  NMR spectra of complex **4**
5. The steric maps of complex **1** and complex **2**
6. Polymerization kinetics

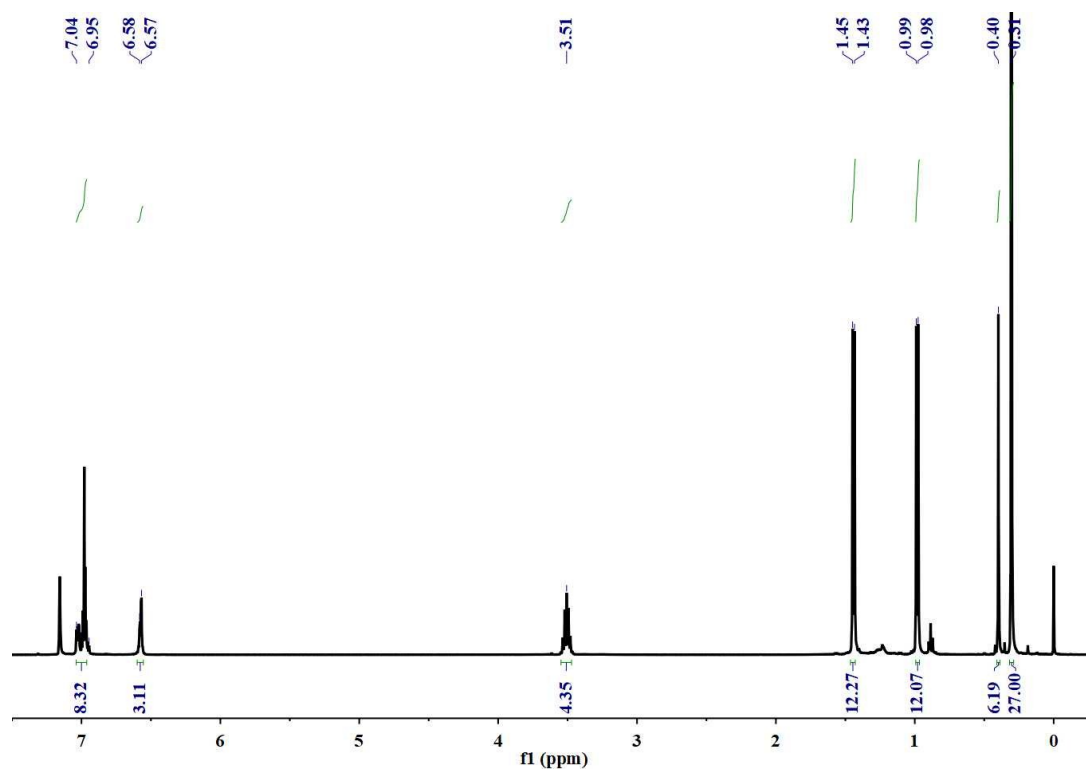

Figure S1.  $^1\text{H}$  NMR spectrum (400 MHz) of complex 1 in  $\text{C}_6\text{D}_6$  at 25 °C.

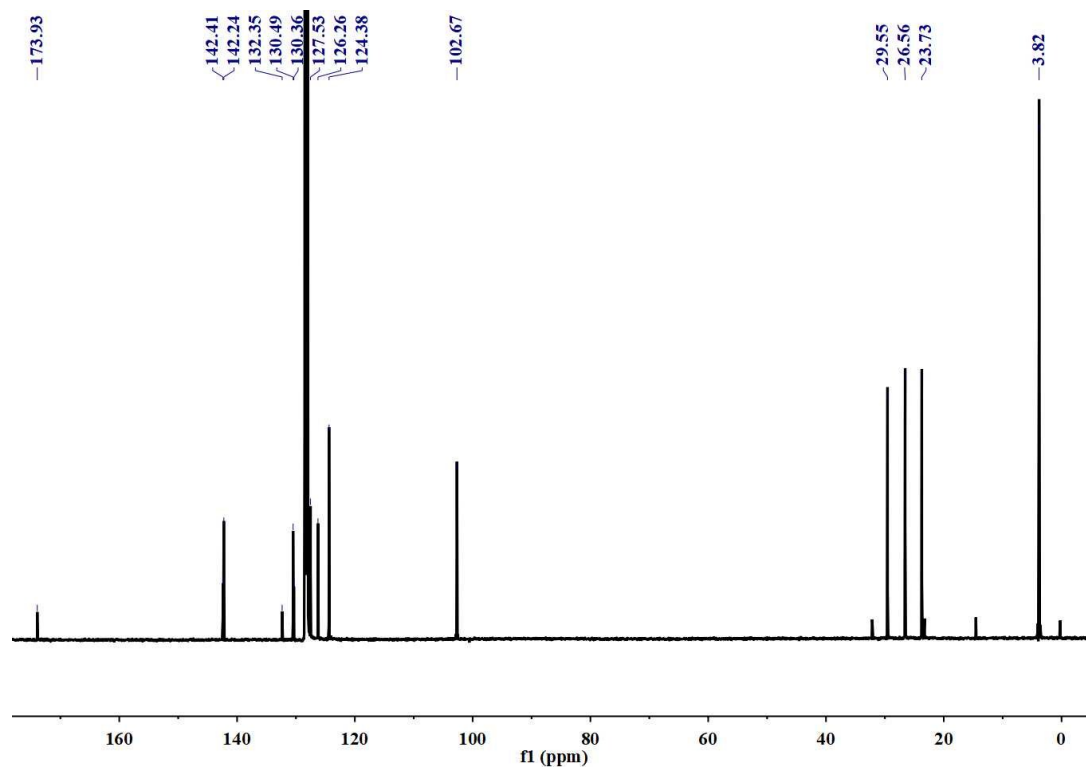

Figure S2.  $^{13}\text{C}\{^1\text{H}\}$  NMR spectrum (101 MHz) of complex 1 in  $\text{C}_6\text{D}_6$  at 25 °C.

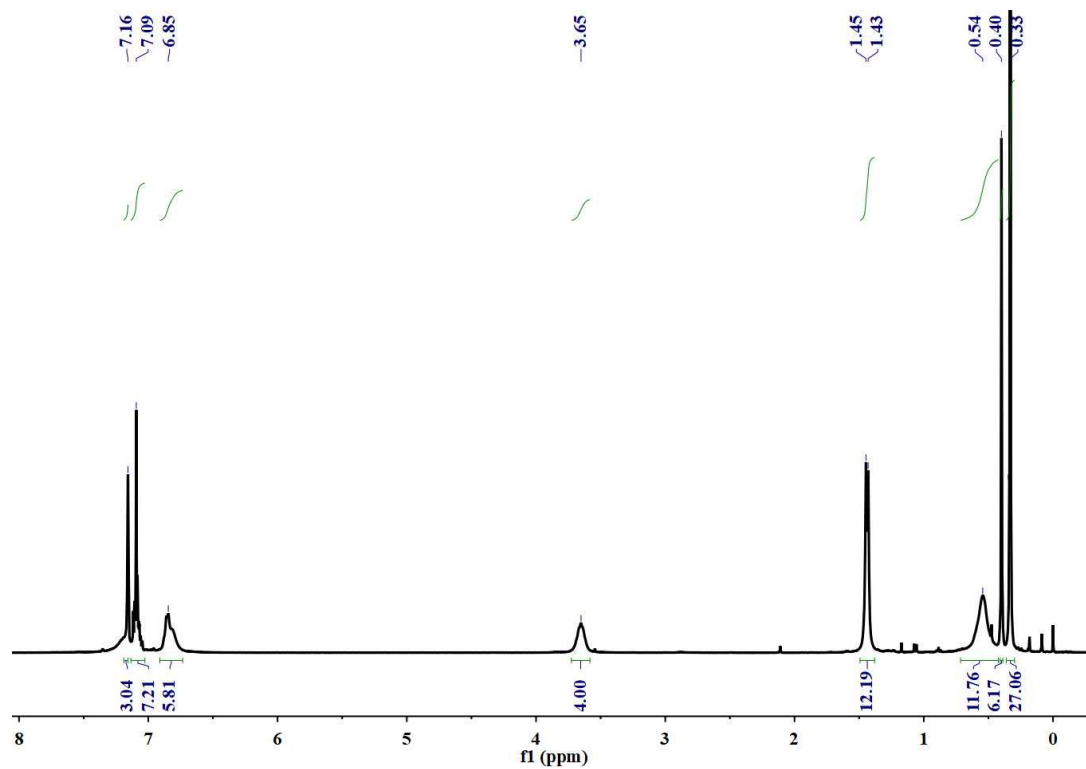

**Figure S3.**  $^1\text{H}$  NMR spectrum (400 MHz) of complex **2** in  $\text{C}_6\text{D}_6$  at  $25^\circ\text{C}$ .

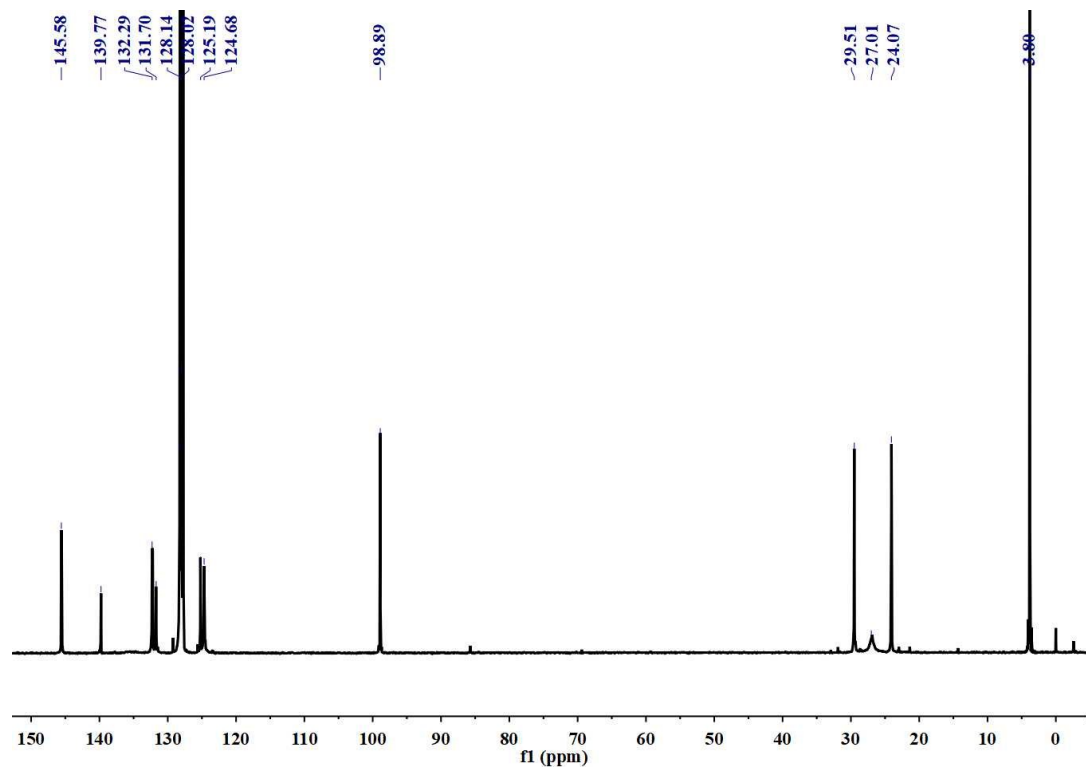

**Figure S4.**  $^{13}\text{C}\{^1\text{H}\}$  NMR spectrum (101 MHz) of complex **2** in  $\text{C}_6\text{D}_6$  at  $25^\circ\text{C}$ .

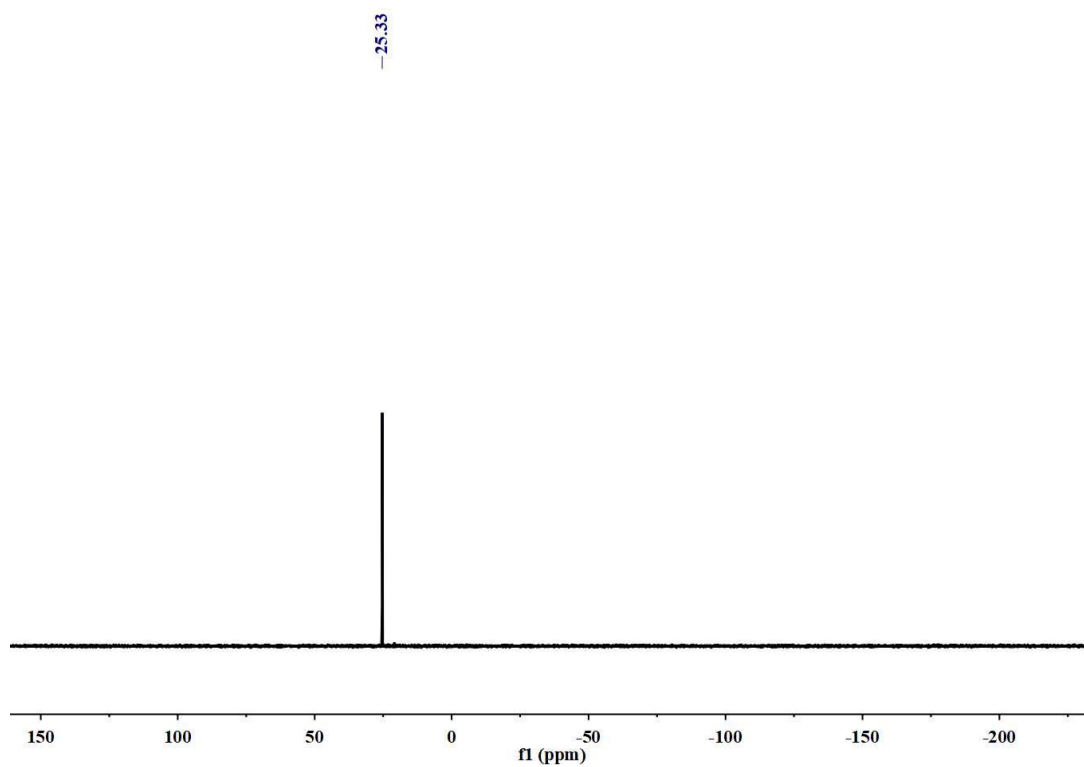

**Figure S5.**  $^{31}\text{P}\{^1\text{H}\}$  NMR spectrum (162 MHz) of complex **2** in  $\text{C}_6\text{D}_6$  at 25 °C.

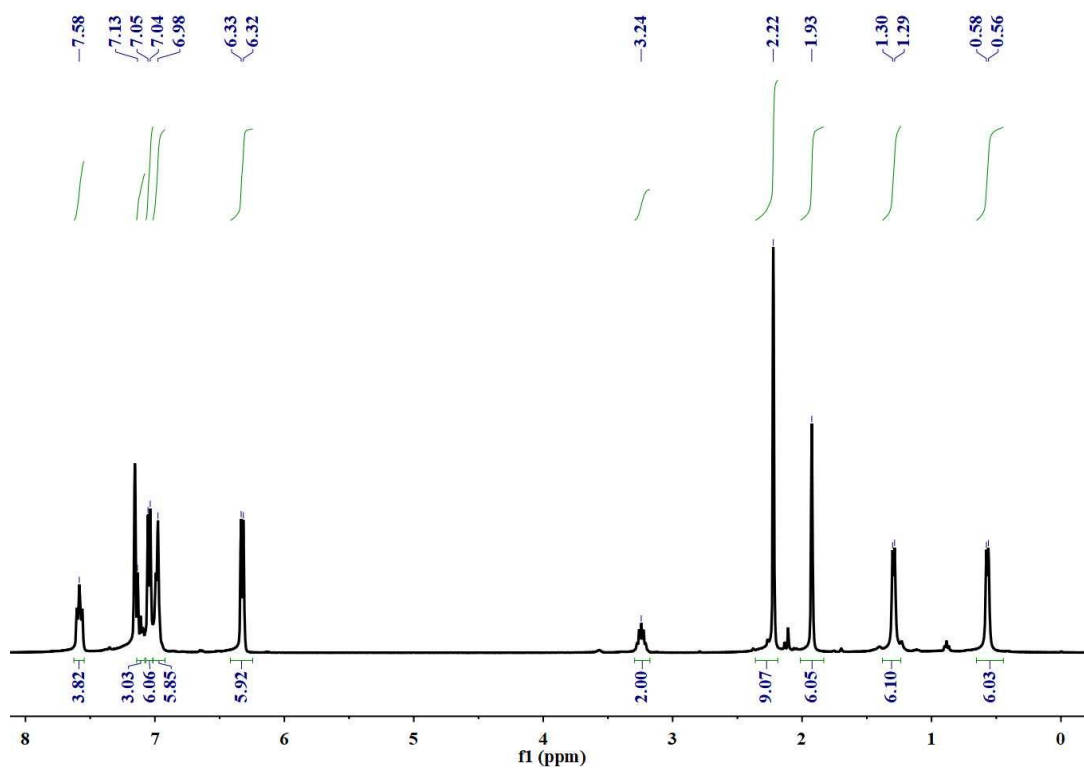

**Figure S6.**  $^1\text{H}$  NMR spectrum (400 MHz) of complex **3** in  $\text{C}_6\text{D}_6$  at 25 °C.

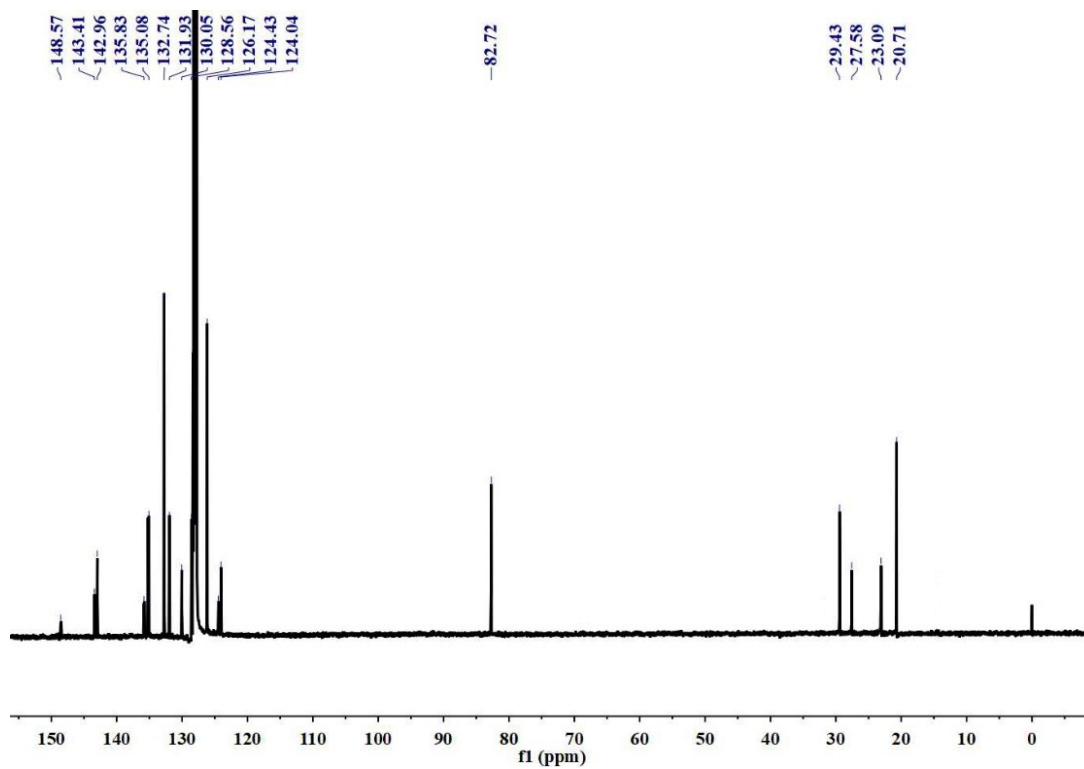

**Figure S7.**  $^{13}\text{C}\{^1\text{H}\}$  NMR spectrum (101 MHz) of complex **3** in  $\text{C}_6\text{D}_6$  at 25 °C.

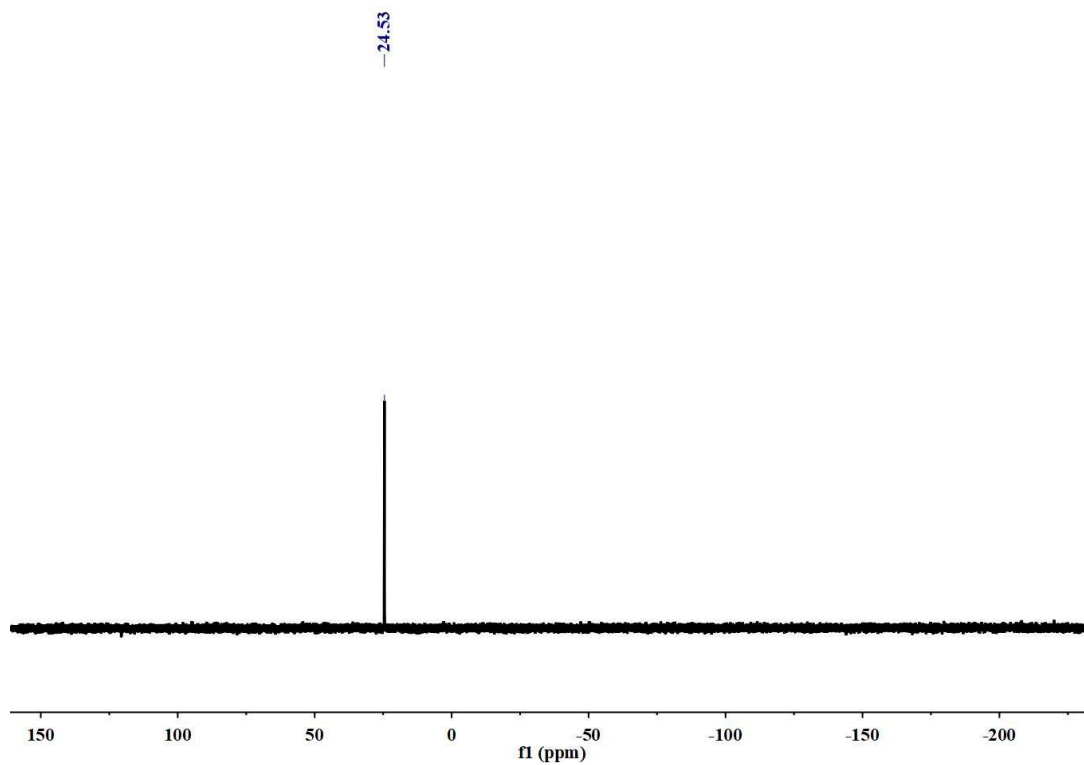

**Figure S8.**  $^{31}\text{P}\{^1\text{H}\}$  NMR spectrum (162 MHz) of complex **3** in  $\text{C}_6\text{D}_6$  at 25 °C.

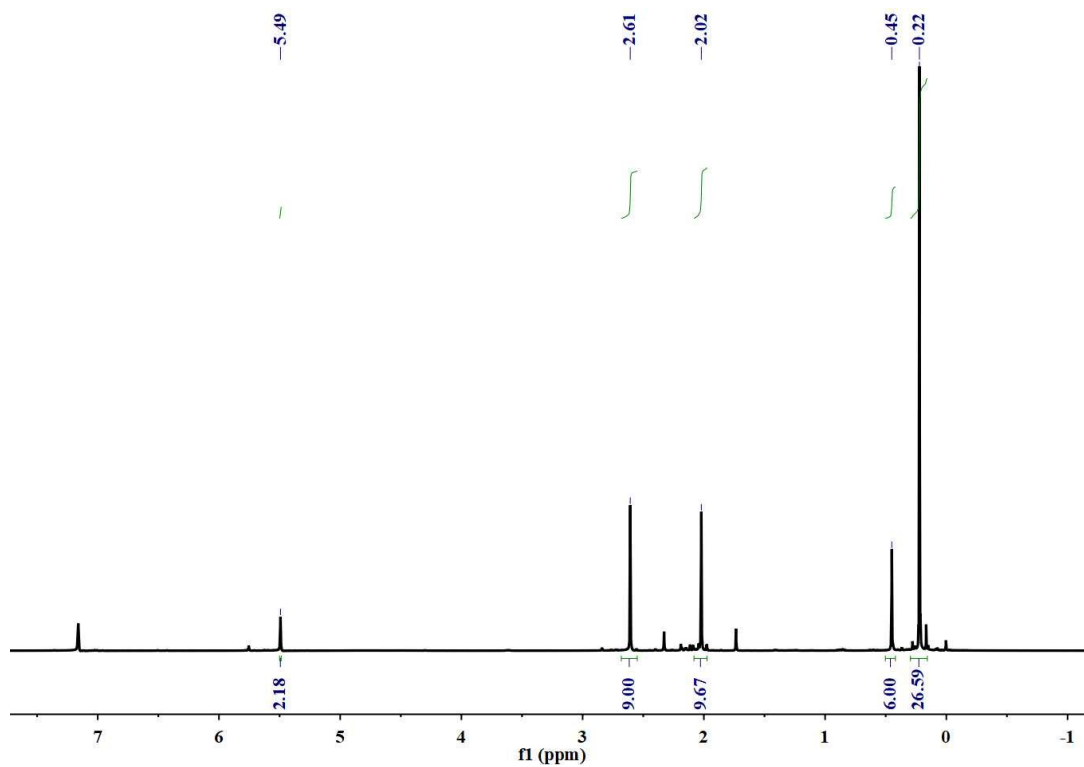

**Figure S9.**  $^1\text{H}$  NMR spectrum (400 MHz) of complex **4** in  $\text{C}_6\text{D}_6$  at 25 °C.

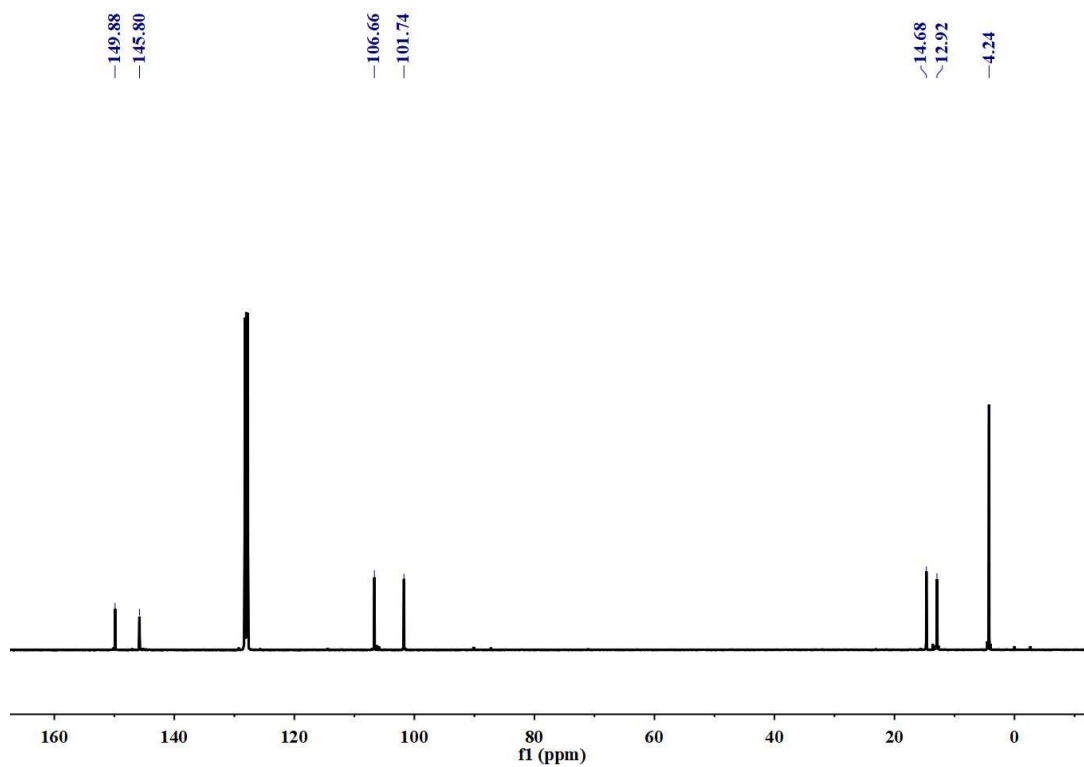

**Figure S10.**  $^{13}\text{C}\{^1\text{H}\}$  NMR spectrum (101 MHz) of complex **4** in  $\text{C}_6\text{D}_6$  at 25 °C.

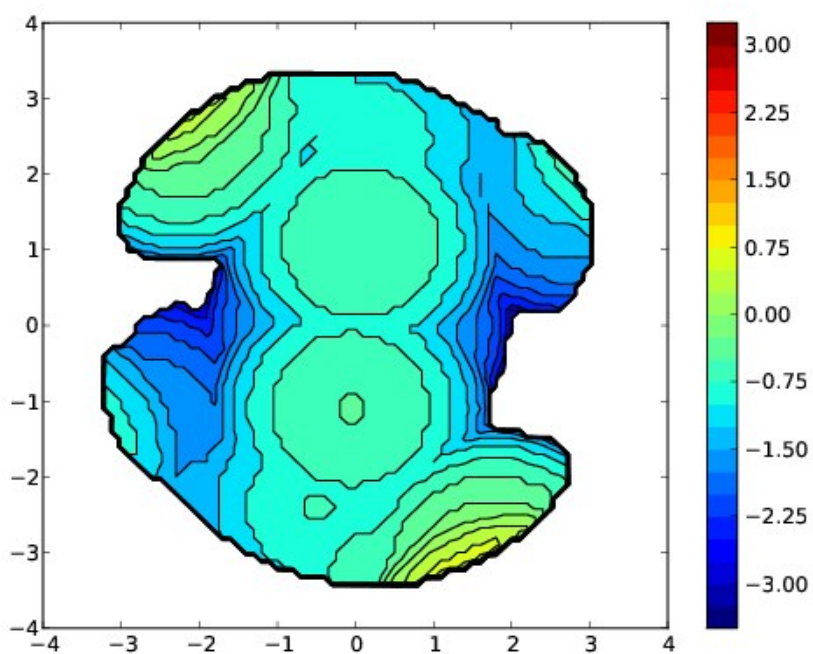

**Figure S11.** The steric map of complex 1

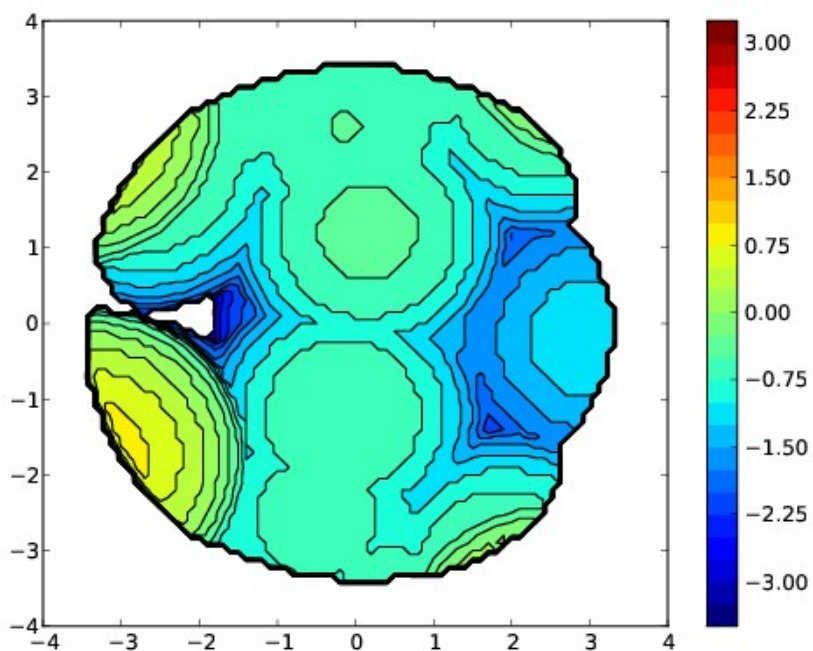

**Figure S12.** The steric map of complex 2

## Experimental details for the polymerization kinetics studies

The catalyst system of complex **1**/[Ph<sub>3</sub>C][B(C<sub>6</sub>F<sub>5</sub>)<sub>4</sub>]/Al<sup>i</sup>Bu<sub>3</sub> and complex **2**/[Ph<sub>3</sub>C][B(C<sub>6</sub>F<sub>5</sub>)<sub>4</sub>]/Al<sup>i</sup>Bu<sub>3</sub> were selected for investigation into the kinetics of the polymerization of isoprene.

Experimental details: Under a N<sub>2</sub> atmosphere at 25 °C, isoprene (0.34 g, 5 mmol) and a deuterated benzene solution (1.5 mL) of Al<sup>i</sup>Bu<sub>3</sub> (25 μmol) were added into a 5 mL flask containing a magnetic stir bar. A deuterated benzene solution (1 mL) of complex **1** (4.65 mg, 5 μmol) or complex **2** (5.12 mg, 5 μmol) and [Ph<sub>3</sub>C][B(C<sub>6</sub>F<sub>5</sub>)<sub>4</sub>] (9.2 mg, 10 μmol) was added quickly by an injector, the conversion of isoprene with time was monitored by <sup>1</sup>H NMR spectroscopy.
